# Supplementary material for: Discovery of a Series of Theophylline Derivatives Containing 1,2,3-Triazole for Treatment of Non-Small Cell Lung Cancer
Source: Frontiers journal article supplement (doi:10.3389/fphar.2021.753676), 2021-10-26
Supplement: Data_Sheet_1.ZIP [file Data_Sheet_1.ZIP]

## Sheet: 吸光度 1_01
检测结果
LO2.skax
2021/5/27 16:19:37
吸光度 1
波长: 450 nm
板 1
吸光值	1	2	3	4	5	6	7	8	9	10	11	12
A
B
C			0.5922	1.0261	0.7727	0.4072	0.2866	0.2274	0.2213	0.2603
D			0.6203	0.7645	0.8211	0.6702	0.4527	0.3058	0.2246	0.2398
E			0.5493	0.8044	0.9231	0.6755	0.4912	0.2889	0.2503	0.2775
F			0.5697	0.8156	0.888	0.623	0.45	0.2978	0.2734	0.2913
G
H
		C	0	1	2	8	16	32	64	128
		Mean	0.582875	0.85265	0.851225	0.593975	0.420125	0.279975	0.2424	0.267225
		SD	0.0304874	0.117695	0.0673105	0.126733	0.0909839	0.0357232	0.0243958	0.0222506
		N	4	4	4	4	4	4	4	4
		0	0.582875	0.0304874	4			1	0.0523052				1	0.0523052		100	5.23052
													1.46284	0.201921		146.284	20.1921
		C	Mean	SD	N		log10C	cell viability	SD	N			1.46039	0.11548		146.039	11.548
		1	0.85265	0.117695	4		0	1.46284	0.201921	4			1.01904	0.217428		101.904	21.7428
		2	0.851225	0.0673105	4		0.30103	1.46039	0.11548	4			0.720781	0.156095		72.0781	15.6095
		8	0.593975	0.126733	4		0.90309	1.01904	0.217428	4			0.480335	0.061288		48.0335	6.1288
		16	0.420125	0.0909839	4		1.20412	0.720781	0.156095	4			0.41587	0.0418542		41.587	4.18542
		32	0.279975	0.0357232	4		1.50515	0.480335	0.061288	4			0.45846	0.0381739		45.846	3.81739
		64	0.2424	0.0243958	4		1.80618	0.41587	0.0418542	4
		128	0.267225	0.0222506	4		2.10721	0.45846	0.0381739	4
													0.5922		0.6203		0.5493		0.5697
													1.0261	1.73269	0.7645	1.23247	0.8044	1.46441	0.8156	1.43163
													0.7727	1.3048	0.8211	1.32371	0.9231	1.6805	0.888	1.55872
													0.4072	0.687606	0.6702	1.08044	0.6755	1.22975	0.623	1.09356
													0.2866	0.483958	0.4527	0.729808	0.4912	0.894229	0.45	0.789889
													0.2274	0.383992	0.3058	0.492987	0.2889	0.525942	0.2978	0.522731
													0.2213	0.373691	0.2246	0.362083	0.2503	0.455671	0.2734	0.479902
													0.2603	0.439547	0.2398	0.386587	0.2775	0.505188	0.2913	0.511322
												IC50	30.76	46.78	73.6
												SD	21.6457

## Sheet: 结果摘要
结果汇总
常规
板	孔	组	样本	吸光度 1 (450nm)
板 1	C03	组 1	未知0001	0.5922
板 1	D03	组 1	未知0009	0.6203
板 1	E03	组 1	未知0017	0.5493
板 1	F03	组 1	未知0025	0.5697
板 1	C04	组 1	未知0002	1.0261
板 1	D04	组 1	未知0010	0.7645
板 1	E04	组 1	未知0018	0.8044
板 1	F04	组 1	未知0026	0.8156
板 1	C05	组 1	未知0003	0.7727
板 1	D05	组 1	未知0011	0.8211
板 1	E05	组 1	未知0019	0.9231
板 1	F05	组 1	未知0027	0.888
板 1	C06	组 1	未知0004	0.4072
板 1	D06	组 1	未知0012	0.6702
板 1	E06	组 1	未知0020	0.6755
板 1	F06	组 1	未知0028	0.623
板 1	C07	组 1	未知0005	0.2866
板 1	D07	组 1	未知0013	0.4527
板 1	E07	组 1	未知0021	0.4912
板 1	F07	组 1	未知0029	0.45
板 1	C08	组 1	未知0006	0.2274
板 1	D08	组 1	未知0014	0.3058
板 1	E08	组 1	未知0022	0.2889
板 1	F08	组 1	未知0030	0.2978
板 1	C09	组 1	未知0007	0.2213
板 1	D09	组 1	未知0015	0.2246
板 1	E09	组 1	未知0023	0.2503
板 1	F09	组 1	未知0031	0.2734
板 1	C10	组 1	未知0008	0.2603
板 1	D10	组 1	未知0016	0.2398
板 1	E10	组 1	未知0024	0.2775
板 1	F10	组 1	未知0032	0.2913

## Sheet: 基本信息
基本信息
	软件版本			SkanIt Software 6.0.1 for Microplate Readers RE, ver. 6.0.1.6
	光学响应补偿			是

## Sheet: 程序信息
程序信息
	程序名称			LO2.skax
	会话注释
	软件版本			SkanIt Software for Microplate Readers RE, ver. 6.0.1.6
	执行时间			2021/5/27 16:19:37
	用户			lenovo-PC\lenovo

## Sheet: 仪器信息
仪器信息
	名称			Varioskan LUX
	ESW 版本			1.00.30
	设置温度			37.00 °C
	序列号			3020-420
	仪器模块
	滤光片
		名称		F62010
		位置		1
		波长		620
		带宽		10
		定义日期和时间		2017/11/9 16:00:00
	滤光片
		名称		F66510
		位置		2
		波长		665
		带宽		10
		定义日期和时间		2017/11/9 16:00:00
		模块的名称		LAT 模块
		模块序列号		LL163103
		模块的名称		TRF 模块
		模块序列号		LT163103
		板适配器名称		96-well adapter for plate without lid
		板适配器编号		2
		孵育器		是
		气体控制		否
		顶部光学器件		是
		底部光学器件		否
		分液器 1		是
		分液器 2		是

## Sheet: 程序设置
程序设置
	测量顺序			3
	开启稳定延迟			否
	开始时检查温度[°C]			否
吸光度 1
	波长[nm]			450
	显示透射率			否
	光程校正			否
	测量时间[ms]			100

## Sheet: 运行日志
运行日志
	时间	事件	信息
	2021/5/27 16:19:37	程序 LO2.skax 已启动
	2021/5/27 16:19:37	温度	30.5°C
	2021/5/27 16:19:37	步骤 吸光度 1 已启动
	2021/5/27 16:19:39	校准	光度测定 1.0 15669
	2021/5/27 16:19:47	步骤 吸光度 1 已结束
	2021/5/27 16:19:47	温度	31.0°C
	2021/5/27 16:19:55	程序 LO2.skax 已结束

## Sheet: 板布局
名称	板 1
板型模板	ANSI/SBS Standard, 96-well
	1	2	3	4	5	6	7	8	9	10	11	12
A
B
C			未知0001	未知0002	未知0003	未知0004	未知0005	未知0006	未知0007	未知0008
			组 1	组 1	组 1	组 1	组 1	组 1	组 1	组 1
			1:1	1:1	1:1	1:1	1:1	1:1	1:1	1:1
D			未知0009	未知0010	未知0011	未知0012	未知0013	未知0014	未知0015	未知0016
			组 1	组 1	组 1	组 1	组 1	组 1	组 1	组 1
			1:1	1:1	1:1	1:1	1:1	1:1	1:1	1:1
E			未知0017	未知0018	未知0019	未知0020	未知0021	未知0022	未知0023	未知0024
			组 1	组 1	组 1	组 1	组 1	组 1	组 1	组 1
			1:1	1:1	1:1	1:1	1:1	1:1	1:1	1:1
F			未知0025	未知0026	未知0027	未知0028	未知0029	未知0030	未知0031	未知0032
			组 1	组 1	组 1	组 1	组 1	组 1	组 1	组 1
			1:1	1:1	1:1	1:1	1:1	1:1	1:1	1:1
G
H
