# Supplementary figures and images for: Discovery of a Series of Theophylline Derivatives Containing 1,2,3-Triazole for Treatment of Non-Small Cell Lung Cancer
Source: Frontiers journal article supplement (doi:10.3389/fphar.2021.753676), 2021-10-26

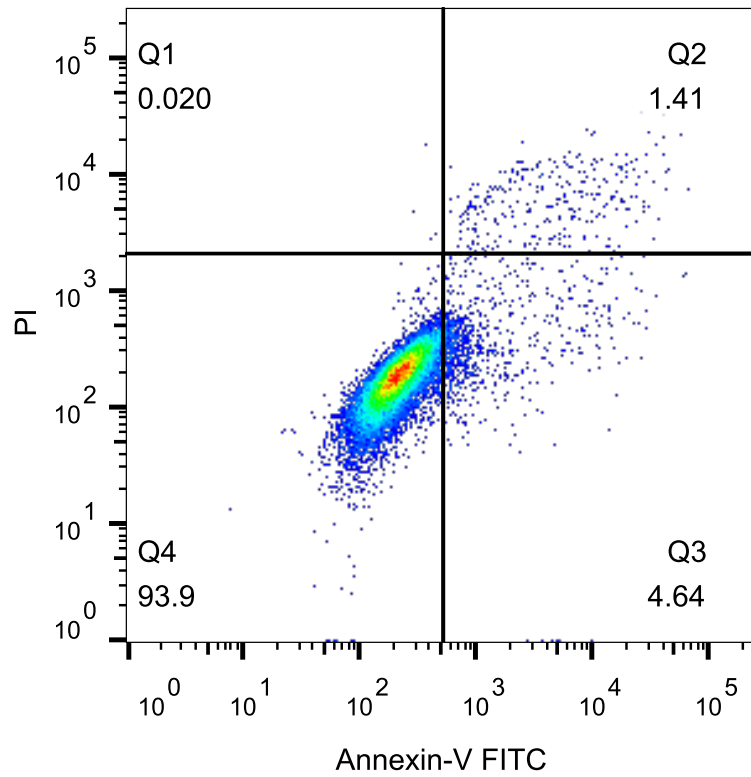

2021 5 13\_d17 5\_002.fcs

Lymphocytes

20000

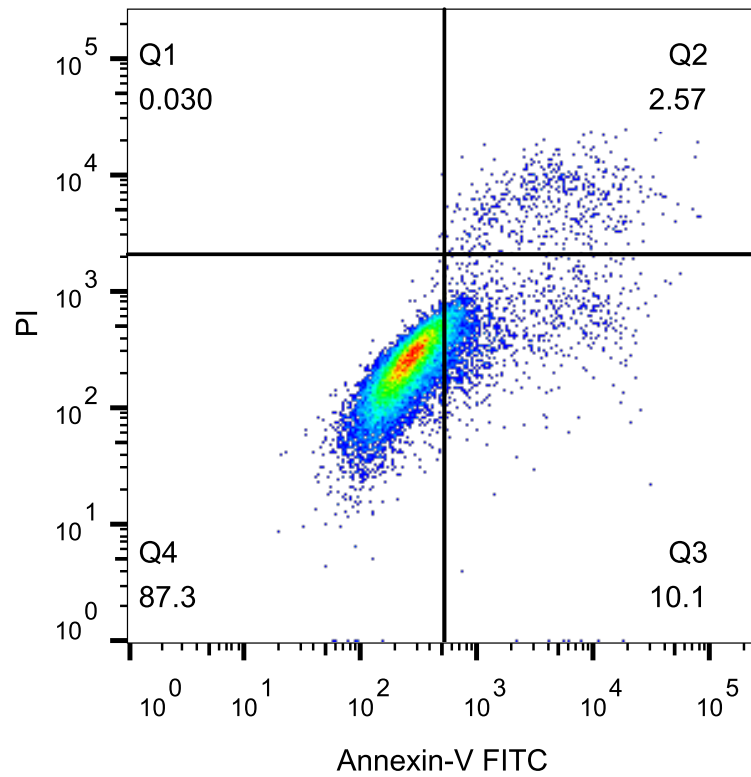

2021 5 13\_d17 10\_003.fcs  
Lymphocytes  
19966

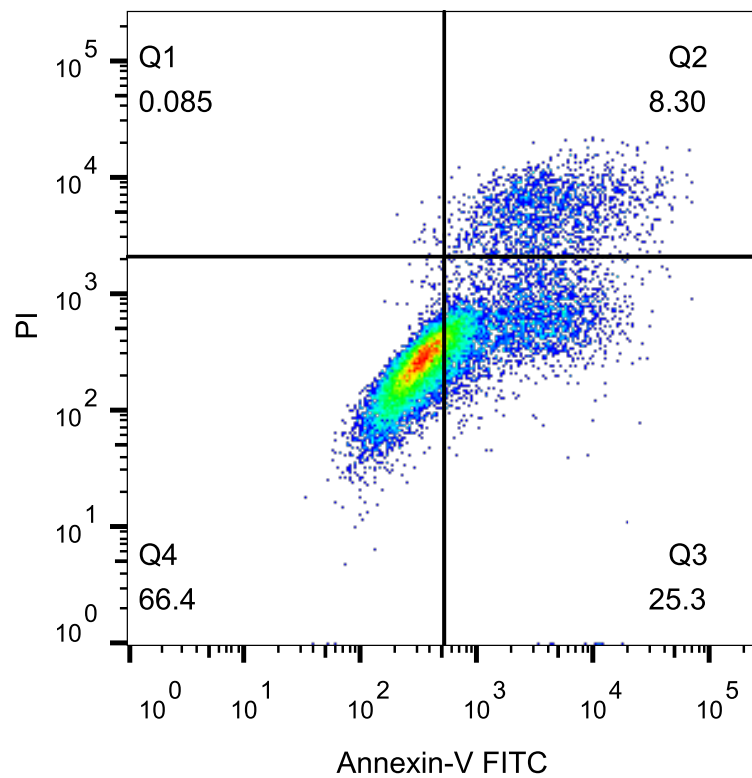

2021 5 13\_d17 15\_004.fcs

Lymphocytes

19918

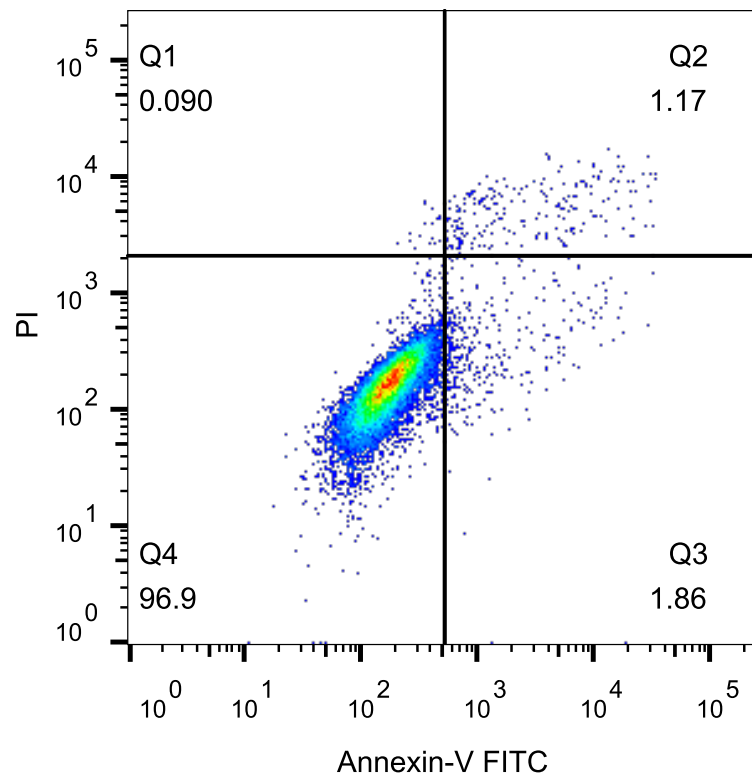

2021 5 13\_d170\_001.fcs

Lymphocytes

20000

Supplement: Data_Sheet_3.ZIP [file Data_Sheet_3.ZIP]
